# Supplementary material for: MicroRNA-20a-5p promotes colorectal cancer invasion and metastasis by downregulating Smad4
Source: PubMed Central journal article supplement (PMC5216716; doi:10.18632/oncotarget.9900), 2016-06-07
Supplement: oncotarget-07-45199-s001.pdf [file oncotarget-07-45199-s001.pdf]

## MicroRNA-20a-5p promotes colorectal cancer invasion and metastasis by downregulating Smad4

### Supplementary Materials

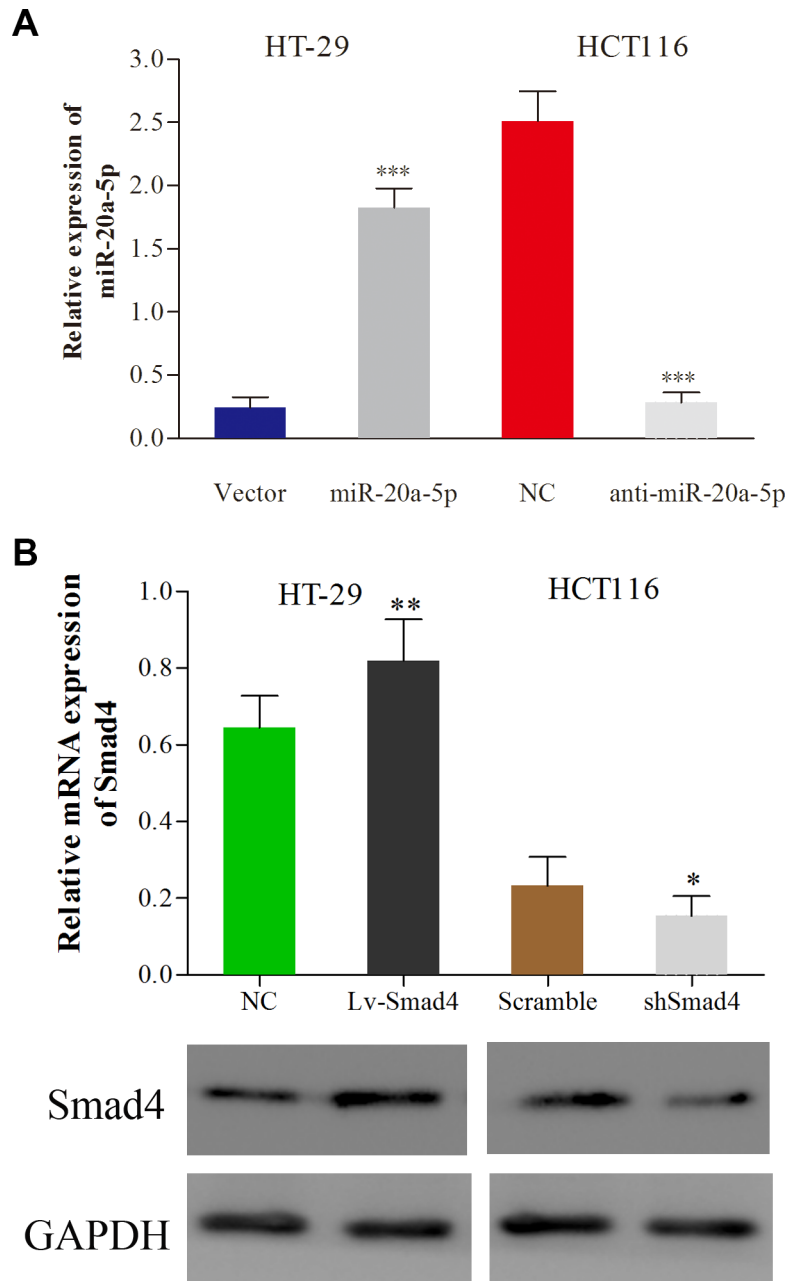

**Supplementary Figure S1: Transfection efficiency of miR-20a-5p and Smad4.** (A) The changes of miR-20a-5p expression level after transfecting miR-20a-5p or anti-miR-20a-5p mimics into HT29 cells or HCT116 cells ( $***P < 0.001$ ). (B) The mRNA and protein levels of Smad4 after over-expressing in HT 29 cells and silencing in HCT116 cells ( $*P < 0.05$   $**P < 0.01$ ).

**Supplementary Table S1:**

| name            | geneName | position                    | targetScanSites | picTarSites | RNA22Sites | PITASites | miRandaSites | program Num | Cancer Num | Pearson Correlation r | P-value    | False Discovery Rate |
|-----------------|----------|-----------------------------|-----------------|-------------|------------|-----------|--------------|-------------|------------|-----------------------|------------|----------------------|
| hsa-miR-34a-5p  | SMAD4    | chr18:48607832-48607839 [+] | 86 [5]          | 86 [5]      | 0 [0]      | 0 [0]     | 86 [5]       | 3           | 8          | -0.06986              | 0.228406   | 0.423708             |
| hsa-miR-130a-3p | SMAD4    | chr18:48606192-48606198 [+] | 423 [13]        | 423 [13]    | 0 [0]      | 0 [0]     | 423 [13]     | 3           | 3          | -0.16995              | 0.00319937 | 0.0180632            |
| hsa-miR-34c-5p  | SMAD4    | chr18:48607832-48607839 [+] | 86 [5]          | 86 [5]      | 0 [0]      | 0 [0]     | 86 [5]       | 3           | 4          | -0.0926               | 0.11006    | 0.258842             |
| hsa-miR-17-5p   | SMAD4    | chr18:48606194-48606200 [+] | 423 [13]        | 423 [13]    | 0 [0]      | 0 [0]     | 423 [13]     | 3           | 5          | -0.29347              | 2.37E-07   | 5.82E-06             |
| hsa-miR-19a-3p  | SMAD4    | chr18:48606191-48606197 [+] | 423 [13]        | 423 [13]    | 0 [0]      | 0 [0]     | 423 [13]     | 3           | 6          | -0.21511              | 0.0001782  | 0.00171915           |
| hsa-miR-20a-5p  | SMAD4    | chr18:48606194-48606200 [+] | 423 [13]        | 423 [13]    | 0 [0]      | 0 [0]     | 423 [13]     | 3           | 4          | -0.26577              | 3.16E-06   | 5.56E-05             |
| hsa-miR-19b-3p  | SMAD4    | chr18:48606191-48606197 [+] | 423 [13]        | 423 [13]    | 0 [0]      | 0 [0]     | 423 [13]     | 3           | 3          | -0.24494              | 1.84E-05   | 2.54E-04             |
| hsa-miR-454-3p  | SMAD4    | chr18:48606192-48606198 [+] | 423 [13]        | 423 [13]    | 0 [0]      | 0 [0]     | 423 [13]     | 3           | 8          | -0.19835              | 5.61E-04   | 0.00442873           |
| hsa-miR-301a-3p | SMAD4    | chr18:48606192-48606198 [+] | 423 [13]        | 423 [13]    | 0 [0]      | 0 [0]     | 423 [13]     | 3           | 7          | -0.06373              | 0.272025   | 0.474478             |
| hsa-miR-301b    | SMAD4    | chr18:48606192-48606198 [+] | 423 [13]        | 423 [13]    | 0 [0]      | 0 [0]     | 423 [13]     | 3           | 5          | -0.03959              | 0.495222   | 0.685726             |
| hsa-miR-130b-3p | SMAD4    | chr18:48606192-48606198 [+] | 423 [13]        | 423 [13]    | 0 [0]      | 0 [0]     | 423 [13]     | 3           | 8          | -0.17432              | 0.00248733 | 0.0147924            |
| hsa-miR-449a    | SMAD4    | chr18:48607832-48607839 [+] | 86 [5]          | 86 [5]      | 0 [0]      | 0 [0]     | 86 [5]       | 3           | 3          | 0.06203               | 0.284975   | 0.488682             |
| hsa-miR-449b-5p | SMAD4    | chr18:48607832-48607839 [+] | 86 [5]          | 86 [5]      | 0 [0]      | 0 [0]     | 86 [5]       | 3           | 3          | 0.0385                | 0.5072     | 0.695583             |
| hsa-miR-93-5p   | SMAD4    | chr18:48606194-48606200 [+] | 423 [13]        | 423 [13]    | 0 [0]      | 0 [0]     | 423 [13]     | 3           | 6          | -0.18584              | 0.00124593 | 0.00848447           |
| hsa-miR-106b-5p | SMAD4    | chr18:48606194-48606200 [+] | 423 [13]        | 423 [13]    | 0 [0]      | 0 [0]     | 423 [13]     | 3           | 6          | -0.17659              | 0.00217809 | 0.0132988            |
| hsa-miR-20b-5p  | SMAD4    | chr18:48606194-48606200 [+] | 423 [13]        | 423 [13]    | 0 [0]      | 0 [0]     | 423 [13]     | 3           | 2          | 0.00938               | 0.871679   | 0.935539             |
| hsa-miR-106a-5p | SMAD4    | chr18:48606194-48606200 [+] | 423 [13]        | 423 [13]    | 0 [0]      | 0 [0]     | 423 [13]     | 3           | 3          | -0.20399              | 3.85E-04   | 0.0032533            |

**Supplementary Table S2: Clinic-pathologic characteristics of 544 colorectal cancer patients**

| Characteristics | No. of patients (%) | Relapse               |                        |
|-----------------|---------------------|-----------------------|------------------------|
|                 |                     | No <i>n</i> = 327 (%) | Yes <i>n</i> = 217 (%) |
| Age             |                     |                       |                        |
| < 65            | 208 (38.2)          | 130 (39.8)            | 78 (35.9)              |
| ≥ 65            | 336 (61.8)          | 197 (60.2)            | 139 (64.1)             |
| Gender          |                     |                       |                        |
| Female          | 264 (48.5)          | 165 (49.5)            | 99 (45.6)              |
| Male            | 280 (51.5)          | 162 (50.5)            | 118 (54.4)             |
| Location        |                     |                       |                        |
| Right           | 124 (22.8)          | 76 (23.2)             | 48 (22.1)              |
| Transverse      | 33 (6.1)            | 20 (6.1)              | 13 (6.0)               |
| Left            | 387 (71.1)          | 231 (70.7)            | 156 (71.9)             |
| pT stage        |                     |                       |                        |
| pT1             | 23 (4.2)            | 20 (6.1)              | 3 (1.4)                |
| pT2             | 94 (17.3)           | 72 (22.0)             | 22 (10.1)              |
| pT3             | 236 (43.4)          | 152(46.5)             | 84 (38.7)              |
| pT4             | 191 (35.1)          | 83 (25.4)             | 108 (49.8)             |
| pN stage        |                     |                       |                        |
| N0              | 314 (57.7)          | 216 (66.1)            | 98 (45.1)              |
| N1              | 164 (30.1)          | 87 (26.6)             | 77 (35.5)              |
| N2              | 66 (12.1)           | 24 (7.3)              | 42 (19.4)              |
| pM stage        |                     |                       |                        |
| M0              | 504                 | 317 (96.9)            | 187 (86.2)             |
| M1              | 40                  | 10 (3.1)              | 30 (13.8)              |
| AJCC stage      |                     |                       |                        |
| I               | 93 (17.1)           | 76 (23.2)             | 17 (7.8)               |
| II              | 208 (38.2)          | 136 (41.6)            | 72 (33.2)              |
| III             | 204 (37.5)          | 106 (32.4)            | 98 (45.2)              |
| IV              | 39 (7.2)            | 9 (2.8)               | 30 (13.8)              |
| Differentiation |                     |                       |                        |
| Well            | 116 (28.0)          | 71 (21.7)             | 45 (20.7)              |
| Moderate        | 336 (41.9)          | 201 (61.5)            | 135 (62.2)             |
| Poor            | 92 (30.1)           | 55 (16.8)             | 37 (17.1)              |
